# Supplementary material
Source: publisher figshare collection journal article supplement (https://acs.figshare.com/ndownloader/files/5769207)
Supplement: Supplementary file 1 [file 5769207]

## SUPPORTING INFORMATION

**HPLC Conditions and UV Wavelengths Employed in this Study.**

| Parent compound<br>and hydrolysis products | $\lambda$<br>(nm) | Eluent                          |
|--------------------------------------------|-------------------|---------------------------------|
| naptalam                                   | 210               | 35% ACN / 65% 2.5 mM TFA        |
| 1-naphthylamine                            | 300               | 50% ACN / 50% 1.0 mM phosphate  |
| salicylanilide                             | 258               | 50% ACN / 50% 1.0 mM phosphate  |
| N,N-diethylsalicylamide                    | 275               | 55% MeOH / 45% 1.0 mM phosphate |
| N-1-naphthylacetamide                      | 280               | 40% ACN / 60% 1.0 mM phosphate  |
| N-methyl-N-1-<br>naphthylacetamide         | 279               | 40% ACN / 60% 1.0 mM phosphate  |
| propanil                                   | 250               | 45% ACN / 55% 1.0 mM phosphate  |
| 3,4-dichloroaniline                        | 250               | 45% ACN / 55% 1.0 mM phosphate  |
| furalaxyl                                  | 264               | 55% ACN / 45% 1.0 mM TFA        |

*Note:* ACN = acetonitrile, TFA = trifluoroacetic acid, MeOH = methanol;  
The pH of the phosphate buffer is 7.4.
